# Supplementary material
Source: MDPI journal article supplement (https://www.mdpi.com/2673-8112/1/1/25)
Supplement: s1 [file s1]

# Size- and time-dependent aerosol removal from a protective box during simulated intubation and extubation procedures

Luka Pirker <sup>1,\*</sup>, Metod Čebašek <sup>2</sup>, Matej Serdinšek <sup>3</sup>, Maja Remškar <sup>1,4</sup>

<sup>1</sup> Jožef Stefan Institute, Jamova Cesta 39, 1000 Ljubljana, Slovenia; luka.pirker@ijs.si; maja.remskar@ijs.si

<sup>2</sup> HYL d.o.o., Brnčičeva Ulica 47, 1231 Ljubljana, Slovenia; metod.cebasek@hyla.si

<sup>3</sup> Department of Anaesthesiology and Surgical Intensive Therapy, University Medical Centre Ljubljana, Zaloška cesta 7, 1000 Ljubljana, Slovenia; matej.serdinsek@kclj.si

<sup>4</sup> Faculty of Mathematics and Physics, University of Ljubljana, Jadranska Cesta 19, 1000 Ljubljana, Slovenia

\* Correspondence: luka.pirker@ijs.si;

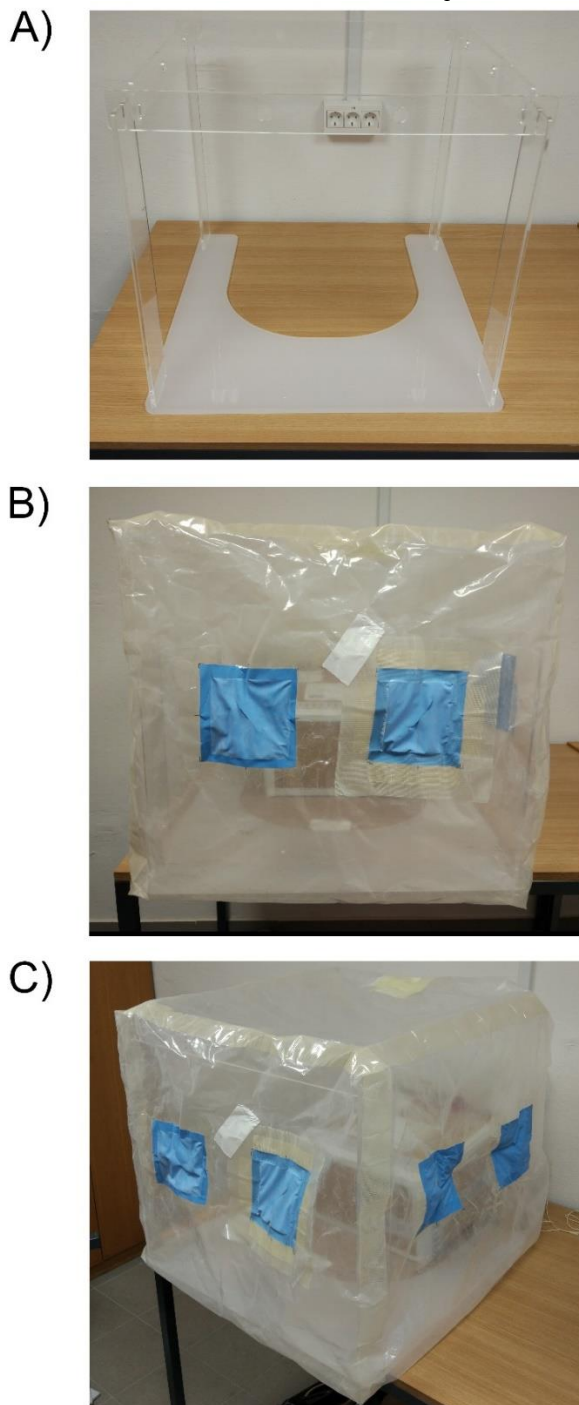

**Figure S1:** (A) The assembled PMMA frame. (B and C) Plastic polypropylene bag with armholes, covered with natural rubber latex sheets. In (B) the view from the operators (anesthesiologist) side is shown. The photographs were taken after the experiments and due to the use of the aerosol standard powder, the polypropylene bag became opaque. Also, the bag was folded multiple times before the photographs were taken.

The normalized concentration,  $dN/d\log D_p$ , measured with the SMPS, is the total concentration ( $dN$ ) in within the measured range divided by the difference between the logarithms ( $d\log D_p$ ) of the lower and upper diameter of the counted particles. This makes the normalized concentration independent on the channel width of the instrument. The normalized concentration in this form is used so that results from instruments with different channel widths can be compared.

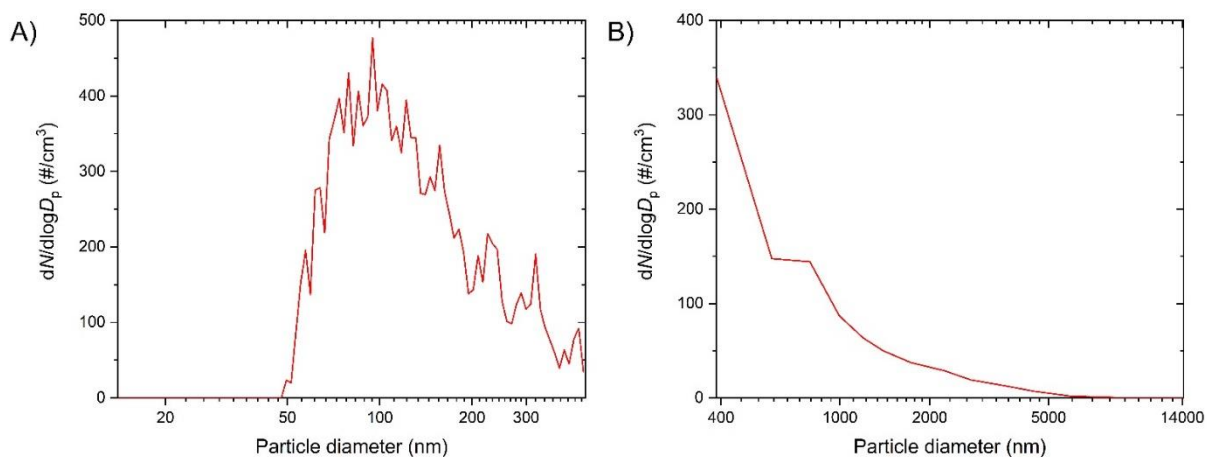

**Figure S2:** Normalized concentration spectra ( $dN/d\log D_p$ ) of (A) SMPS and (B) LPC during the cough calibration.
